# Supplementary material for: Prepregnancy body mass index, gestational weight gain, and maternal prepartum inflammation in normal pregnancies: findings from a Chinese cohort
Source: Springer Nature journal article supplement (doi:10.1186/s12884-022-04849-y), 2022-06-29

## Study Participant Flowchart

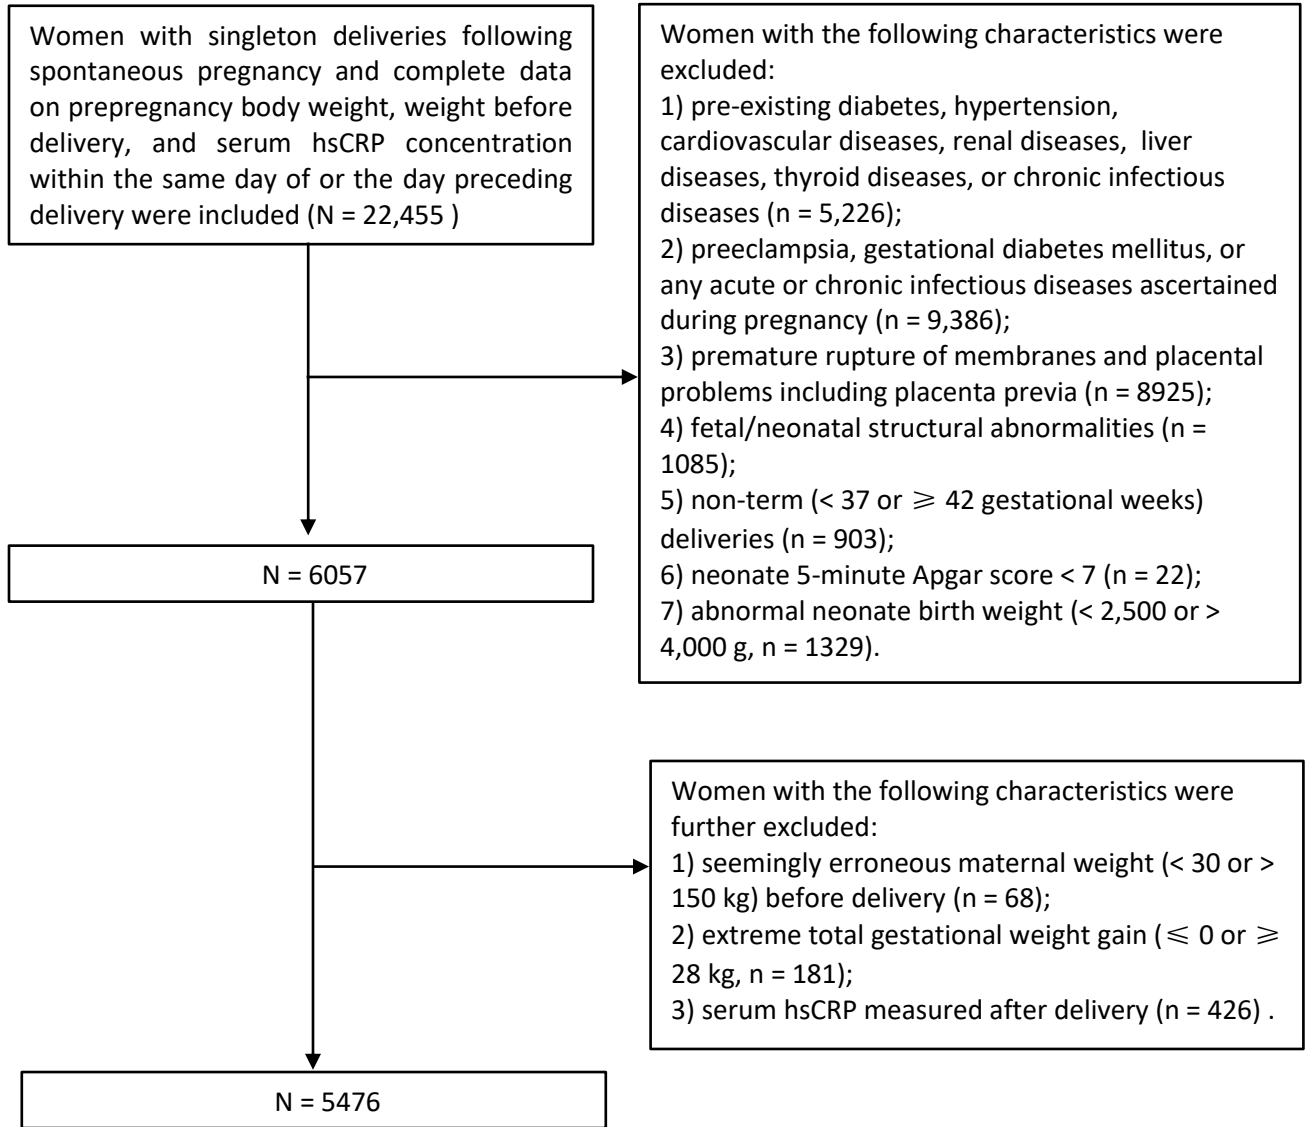

Supplement: MOESM1 [file 23219876]
